# Supplementary material for: Post-polymerization modification of reactive polymers derived from vinylcyclopropane: 1. synthesis and thermo-responsive behaviour
Source: Royal Society of Chemistry journal article supplement (doi:10.1039/c3py00109a), 2013-01-01

## Supporting Information

### Post-Polymerization Modification of Reactive Polymers derived from Vinylcyclopropane: 1. Synthesis and Thermo-Responsive Behaviour

Denis Seuyep, Gerrit A. Luinstra, Patrick Theato\*

#### Synthesis of 1-cyano-1-methoxycarbonyl -2-vinylcyclopropane (CMVCP).

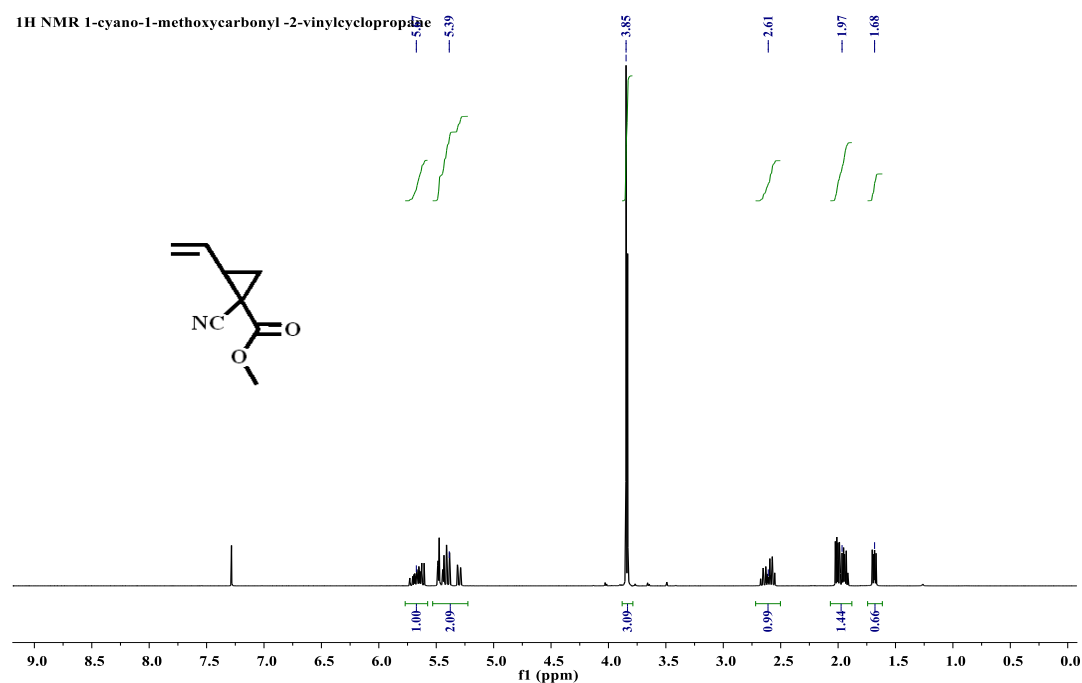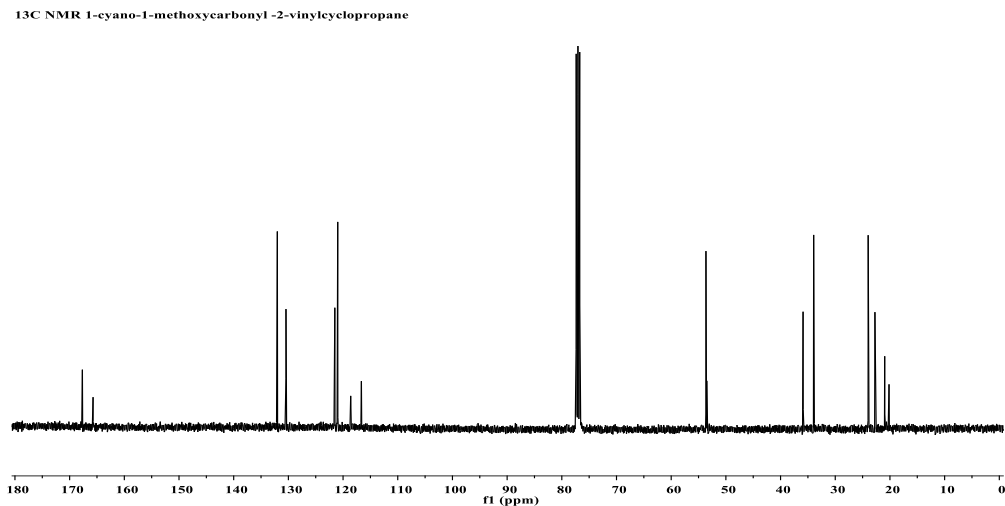

EI-MS of 1-cyano-1-methoxycarbonyl-2-vinylcyclopropane (CMVCP)

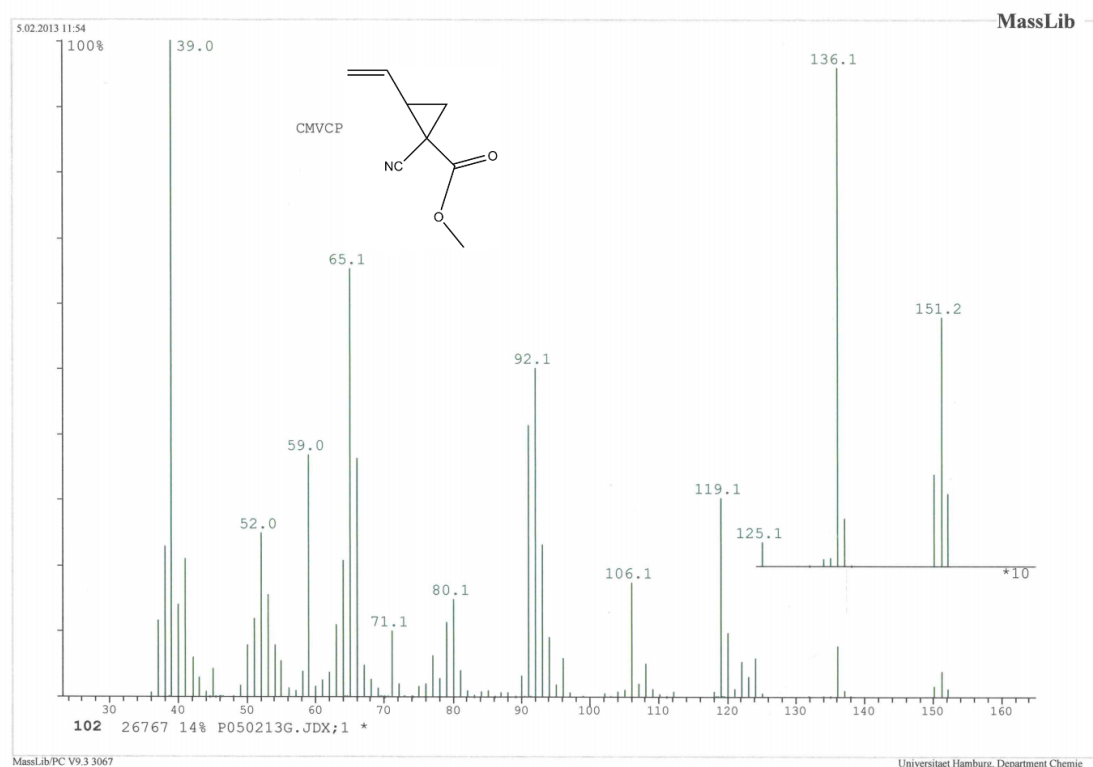

Hydrolysis of 1-cyano-1-methoxycarbonyl-2-vinylcyclopropane (2).

<sup>1</sup>H NMR of 1-cyano-2-vinylcyclopropanecarboxylic acid

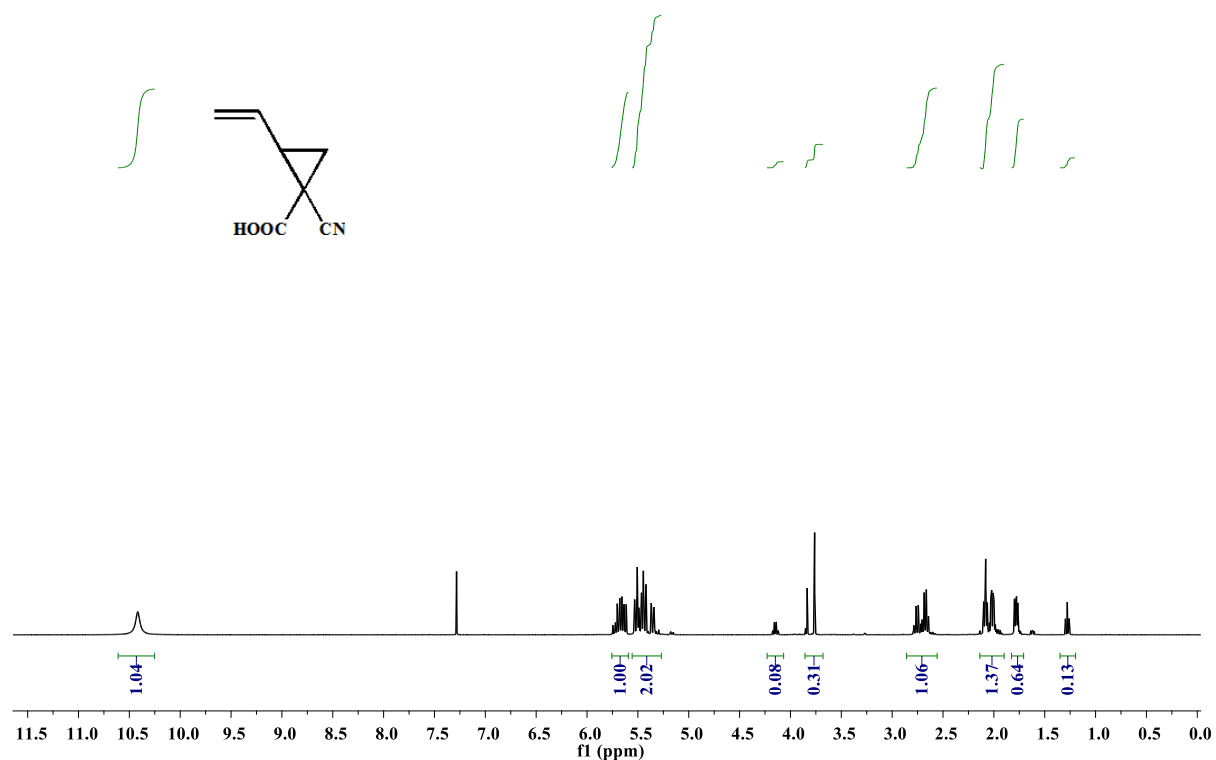

**<sup>13</sup>C NMR of 1-cyano-2-vinylcyclopropanecarboxylic acid**

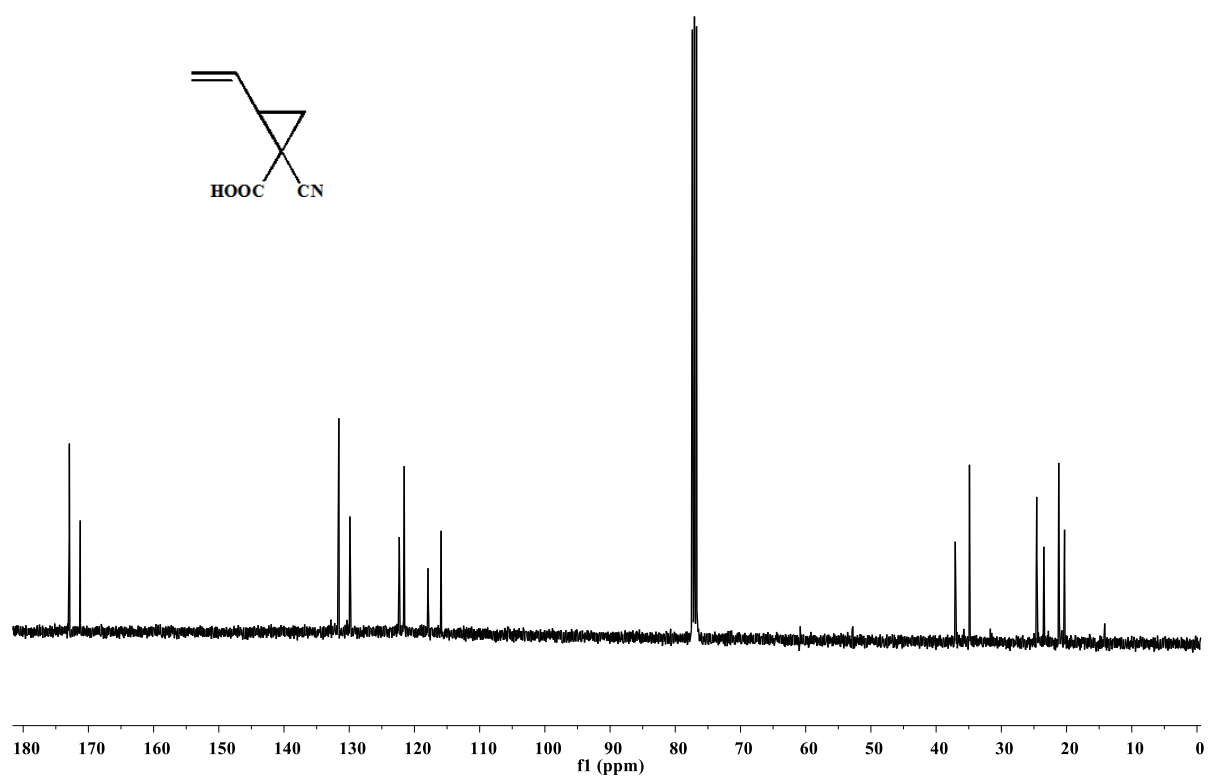

**EL-MS of 1-cyano-2-vinylcyclopropanecarboxylic acid (2)**

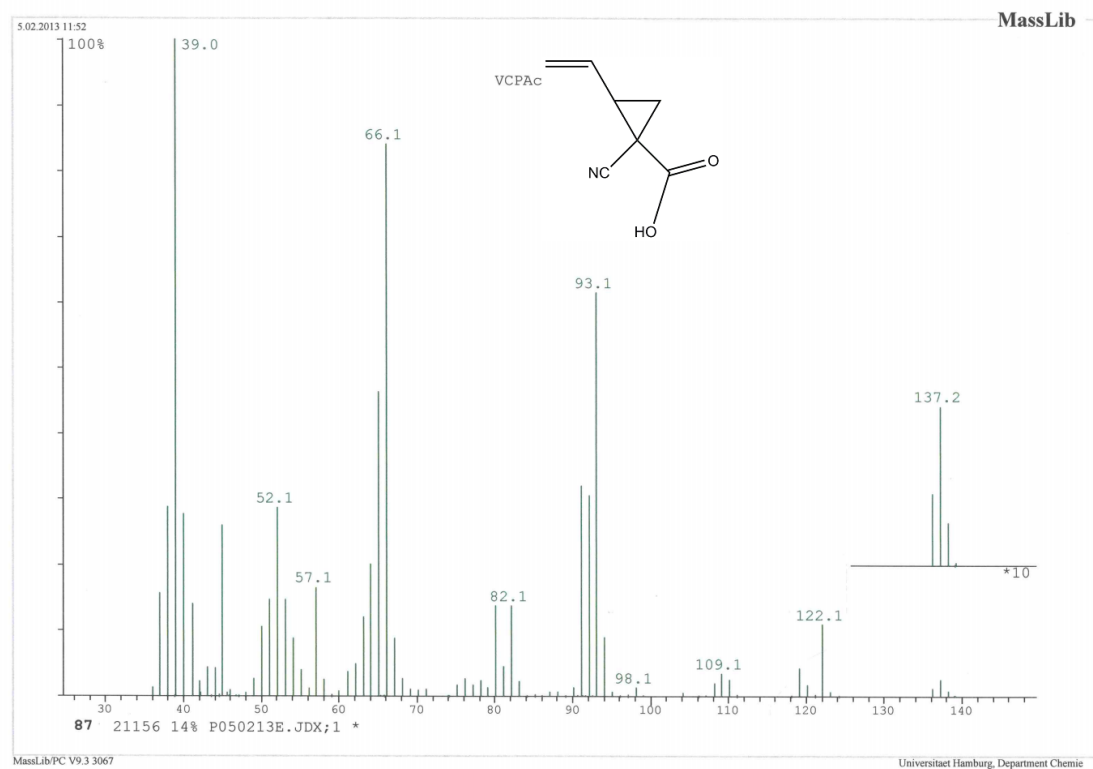

## Synthesis of 1-cyano-1-pentafluorophenoxyacetyl-2-vinylcyclopropane (CPFPVCP).

<sup>1</sup>H NMR 1-cyano-1-pentafluorophenoxyacetyl-2-vinylcyclopropane

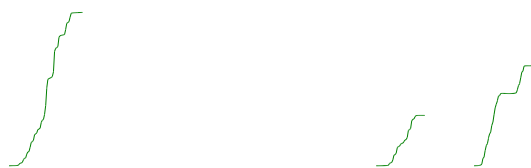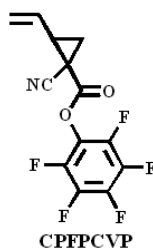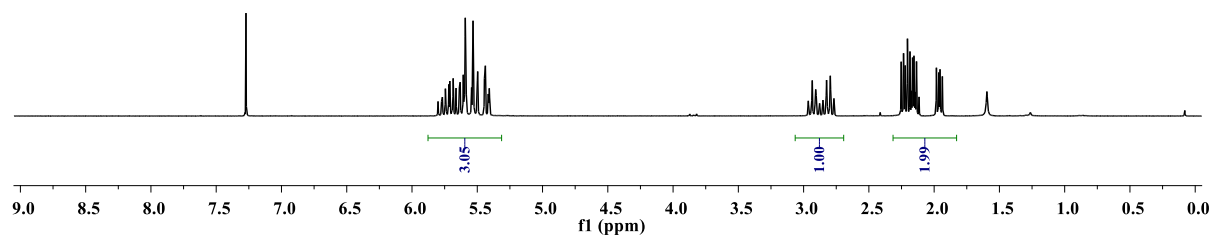

<sup>13</sup>C NMR 1-cyano-1-pentafluorophenoxyacetyl-2-vinylcyclopropane

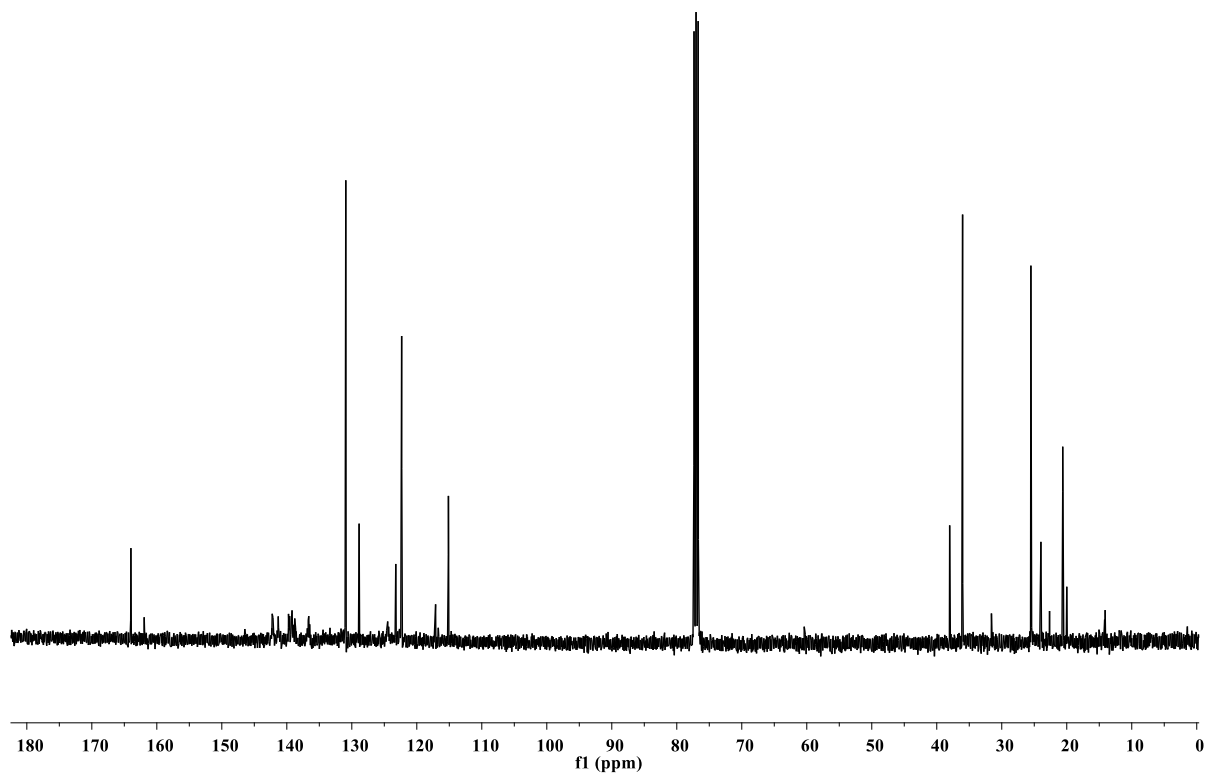

EI-MS of 1-cyano-1-pentafluorophenoxyacetyl-2-vinylcyclopropane (CPFPVCP)

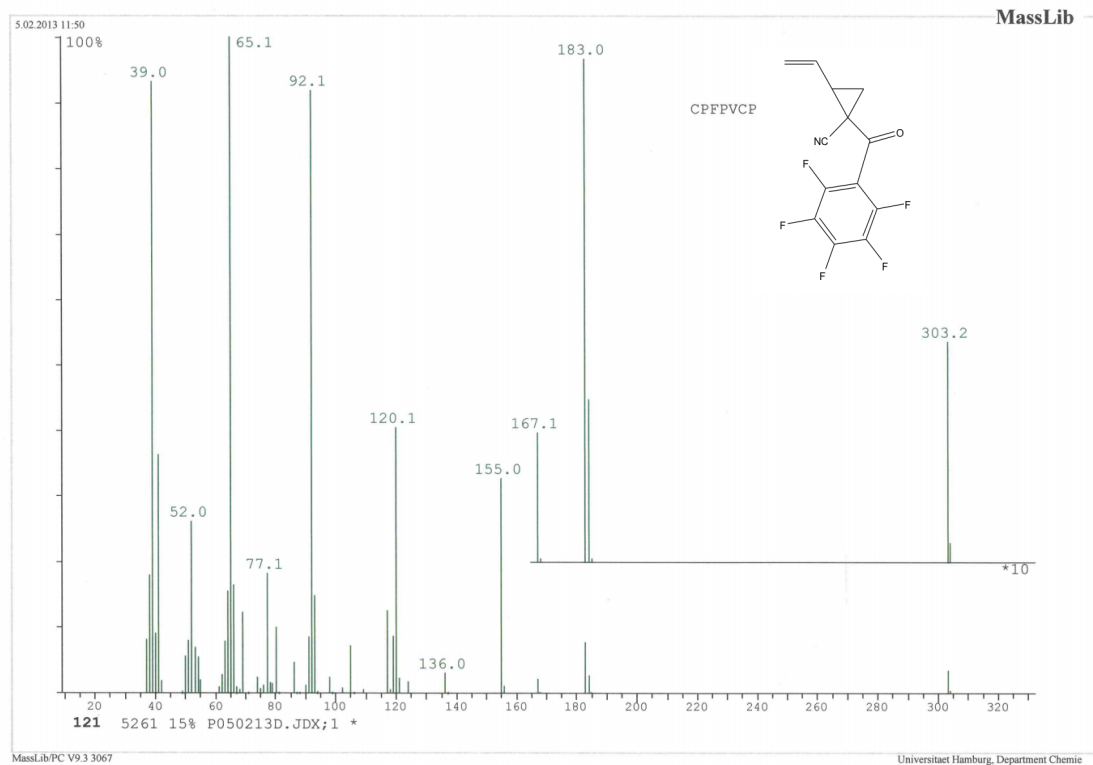

<sup>19</sup>F NMR 1-cyano-1-pentafluorophenoxyacetyl-2-vinylcyclopropane

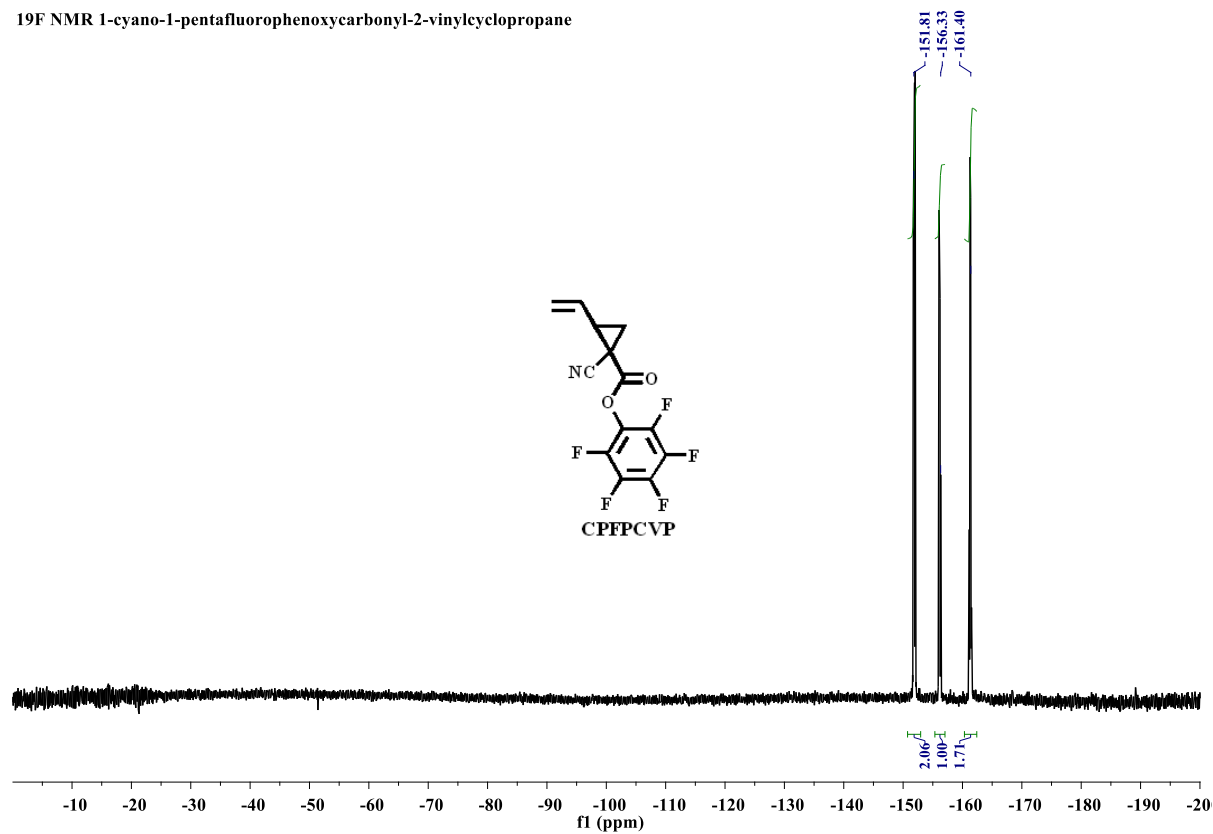

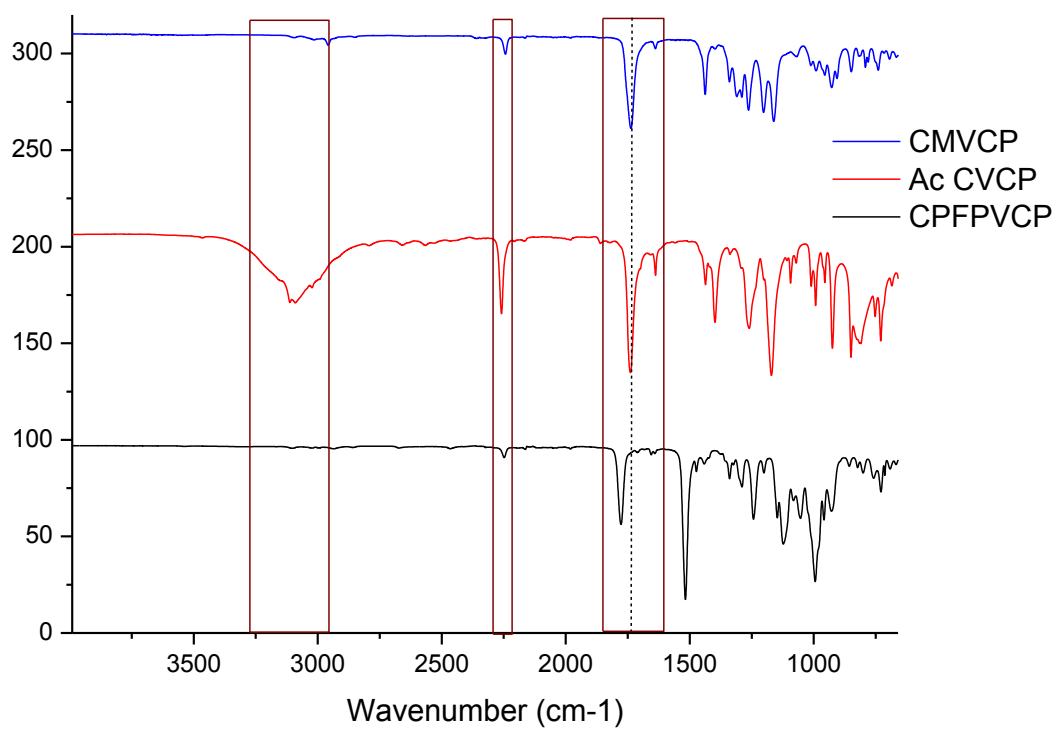

### Polymerization of 1-cyano-1-pentafluorophenoxy carbonyl-2-vinylcyclopropane

<sup>19</sup>F NMR spectra of PCFPVCP in CDCl<sub>3</sub>

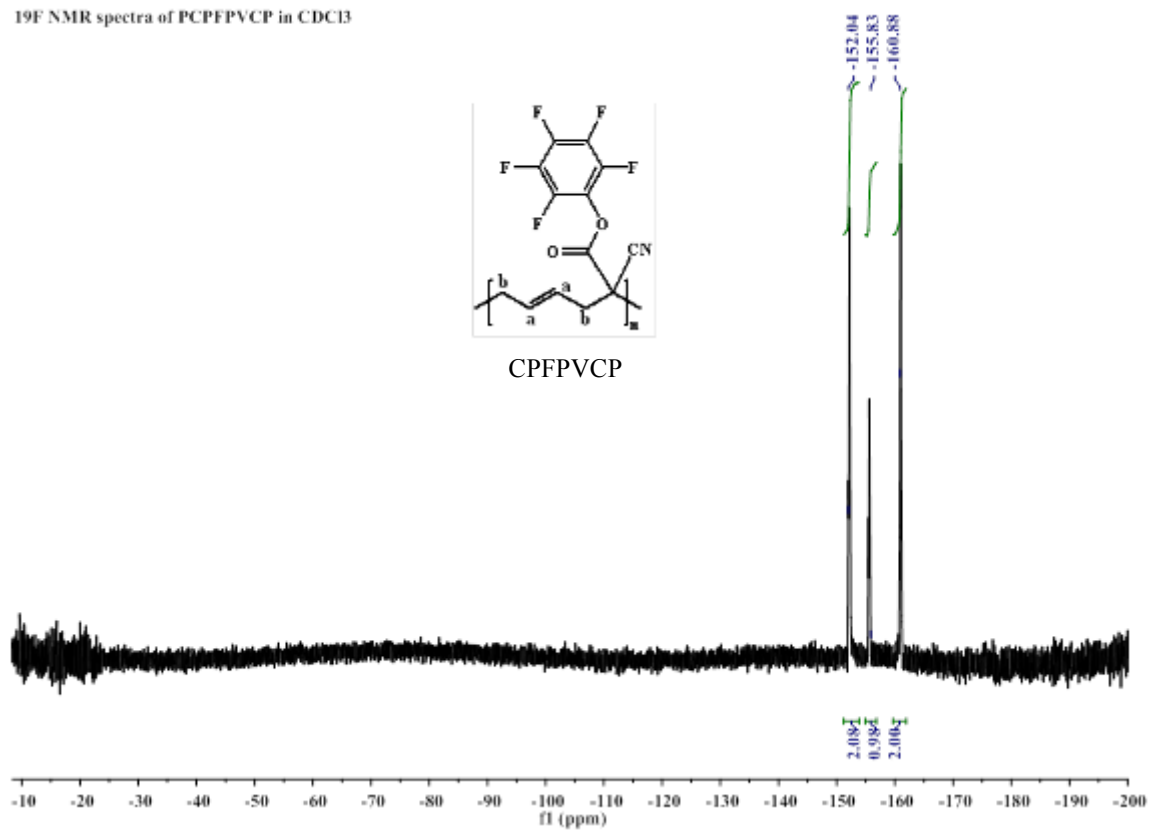

<sup>13</sup>C NMR of PCFPVCP (APT)

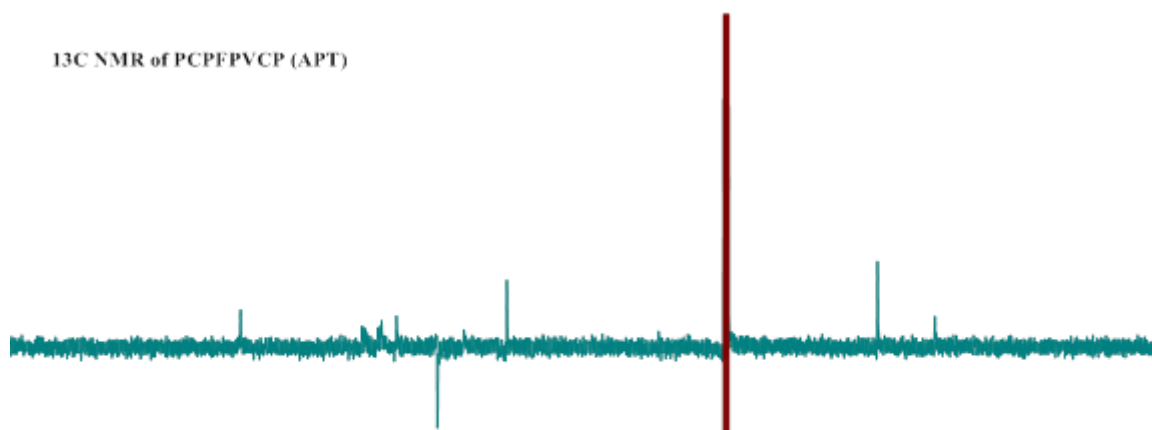

<sup>13</sup>C NMR of PCFPVCP

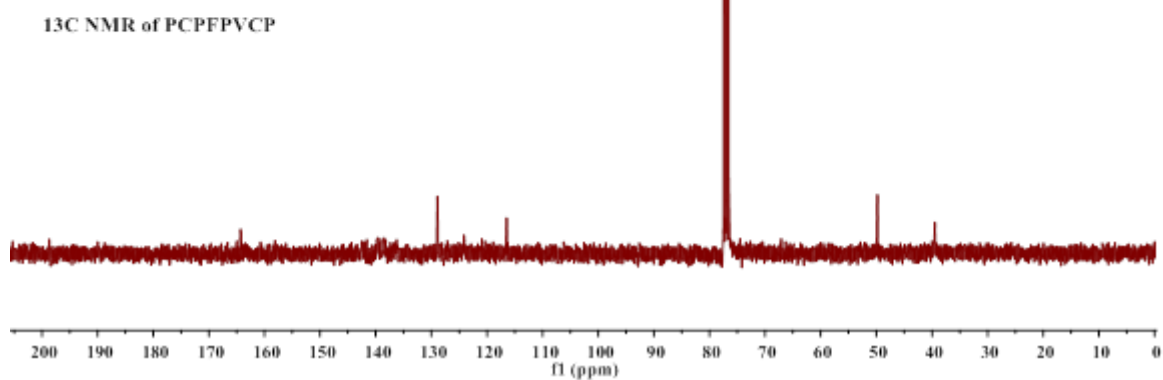

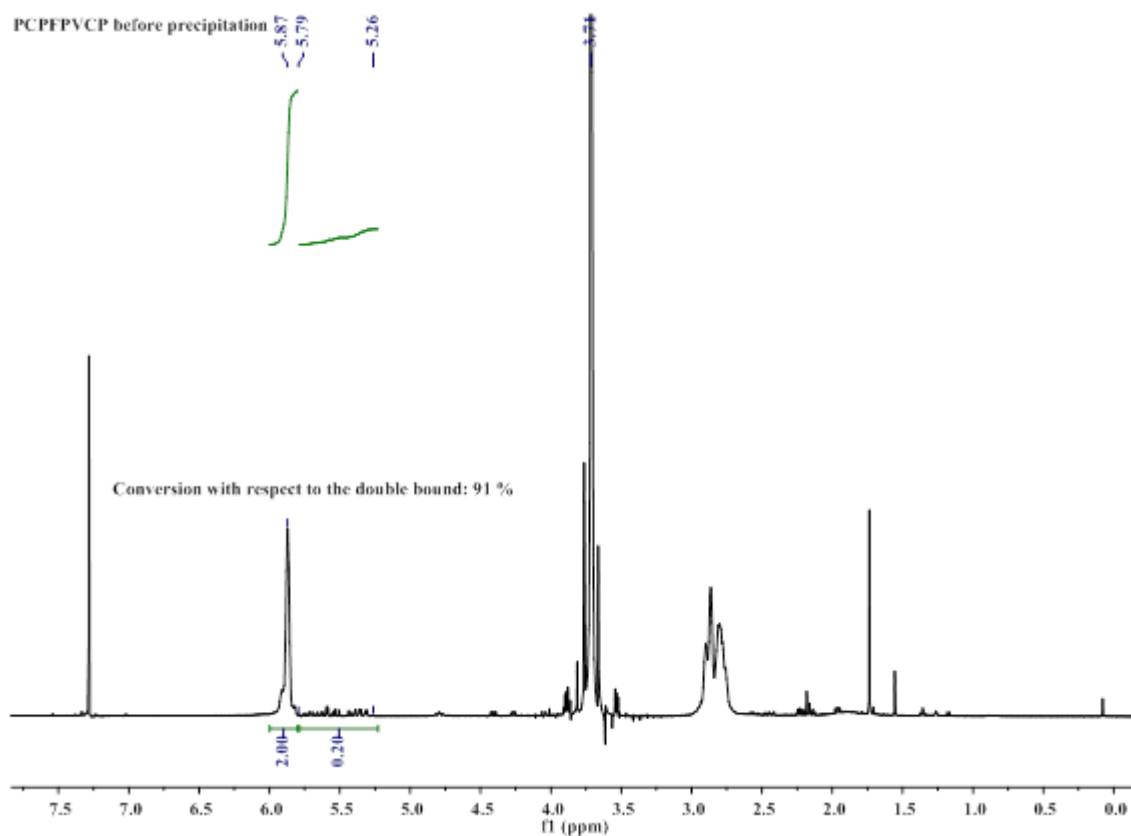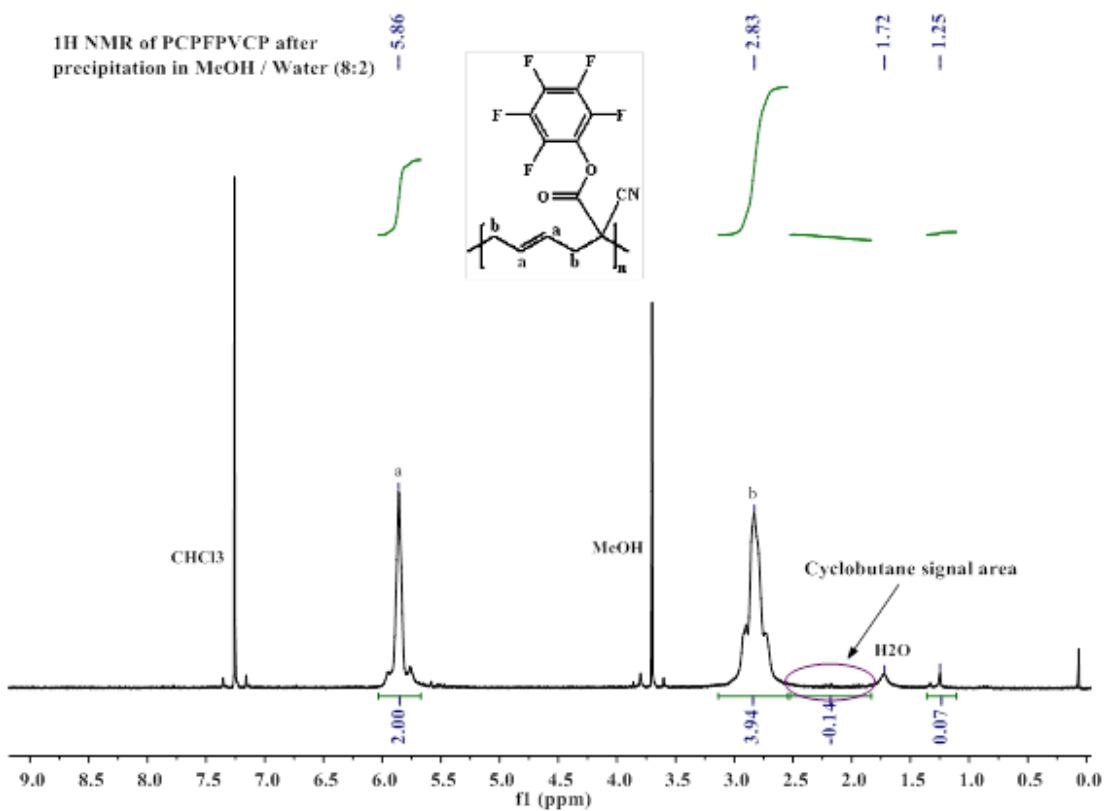



## Reaction of poly(1-cyano-1-pentafluoro-phenoxy-carbonyl-2-vinylcyclopropane) (PCPFPVCP) with different primary amines.

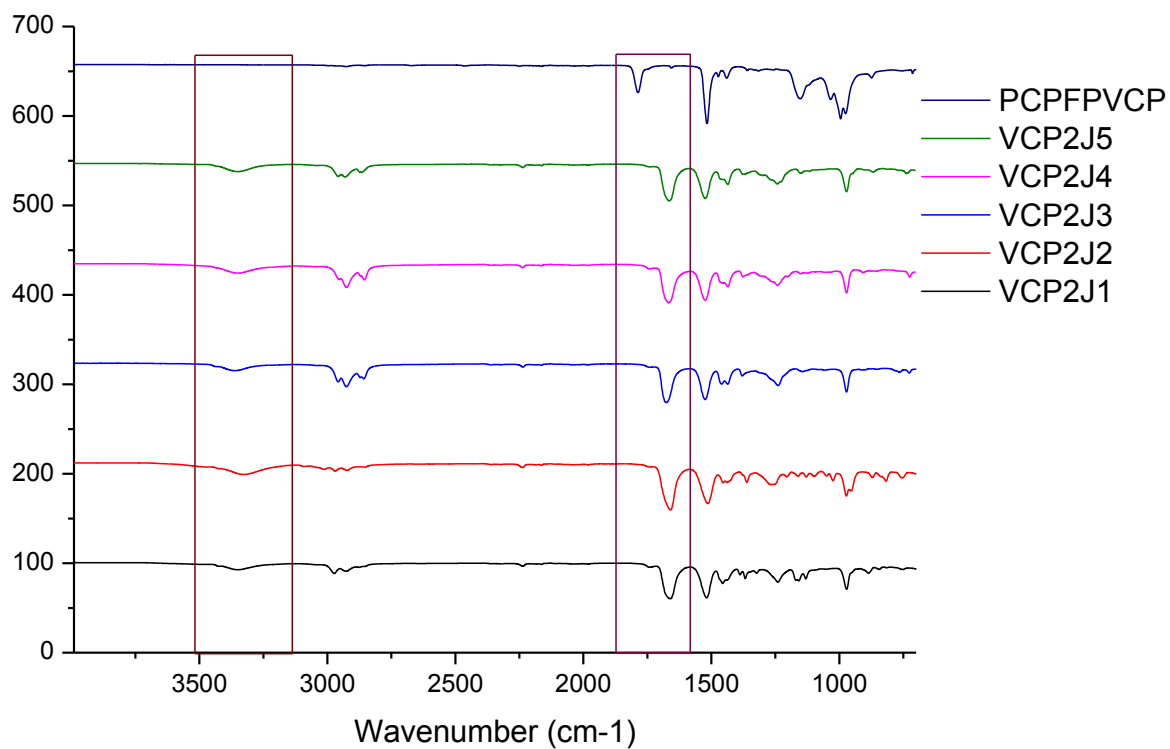

<sup>19</sup>F NMR VCP2J5 in CDCl<sub>3</sub>

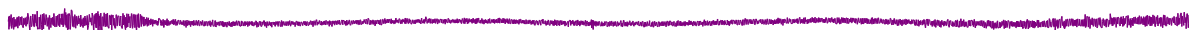

<sup>19</sup>F NMR VCP2J4 in CDCl<sub>3</sub>

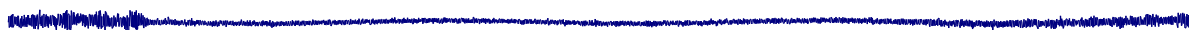

<sup>19</sup>F NMR VCP2J3 in CDCl<sub>3</sub>

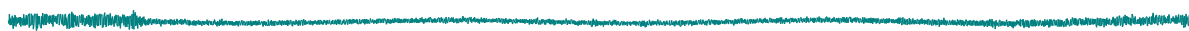

<sup>19</sup>F NMR VCP2J2 in CDCl<sub>3</sub>

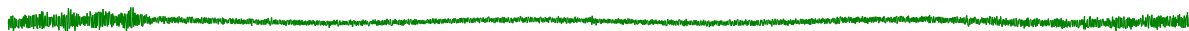

<sup>19</sup>F NMR VCP2J1 in CDCl<sub>3</sub>

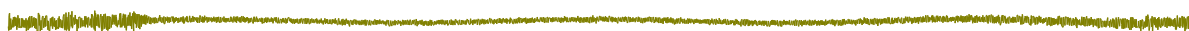

<sup>19</sup>F NMR PCPFPVCP in CDCl<sub>3</sub>

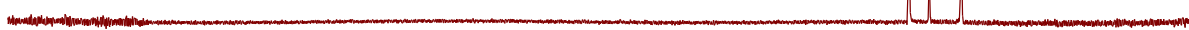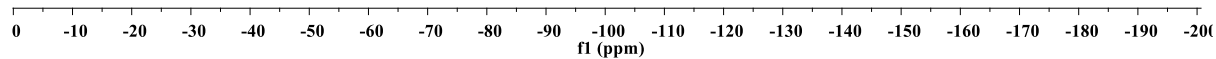

## Poly(N-Isopropyl-2-cyano-4-enamide) VCP2J1

<sup>1</sup>H NMR VCP2J1

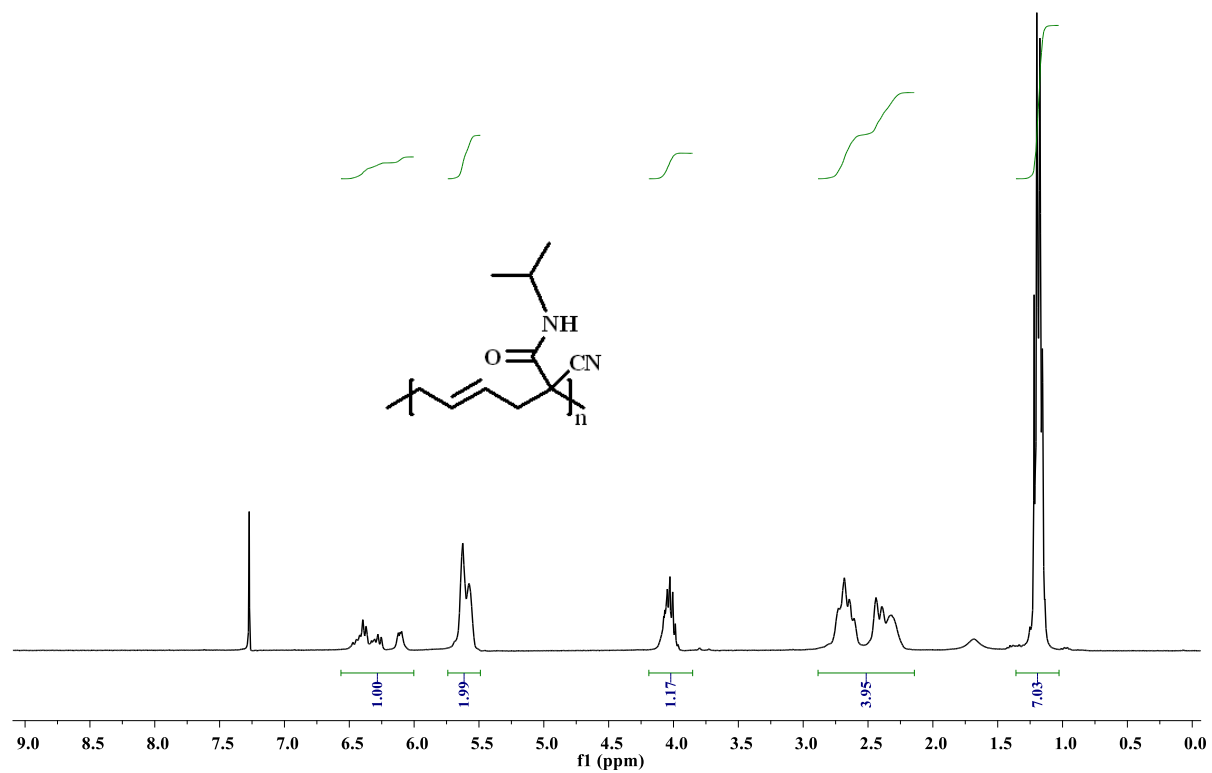

<sup>13</sup>C NMR VCP2J1

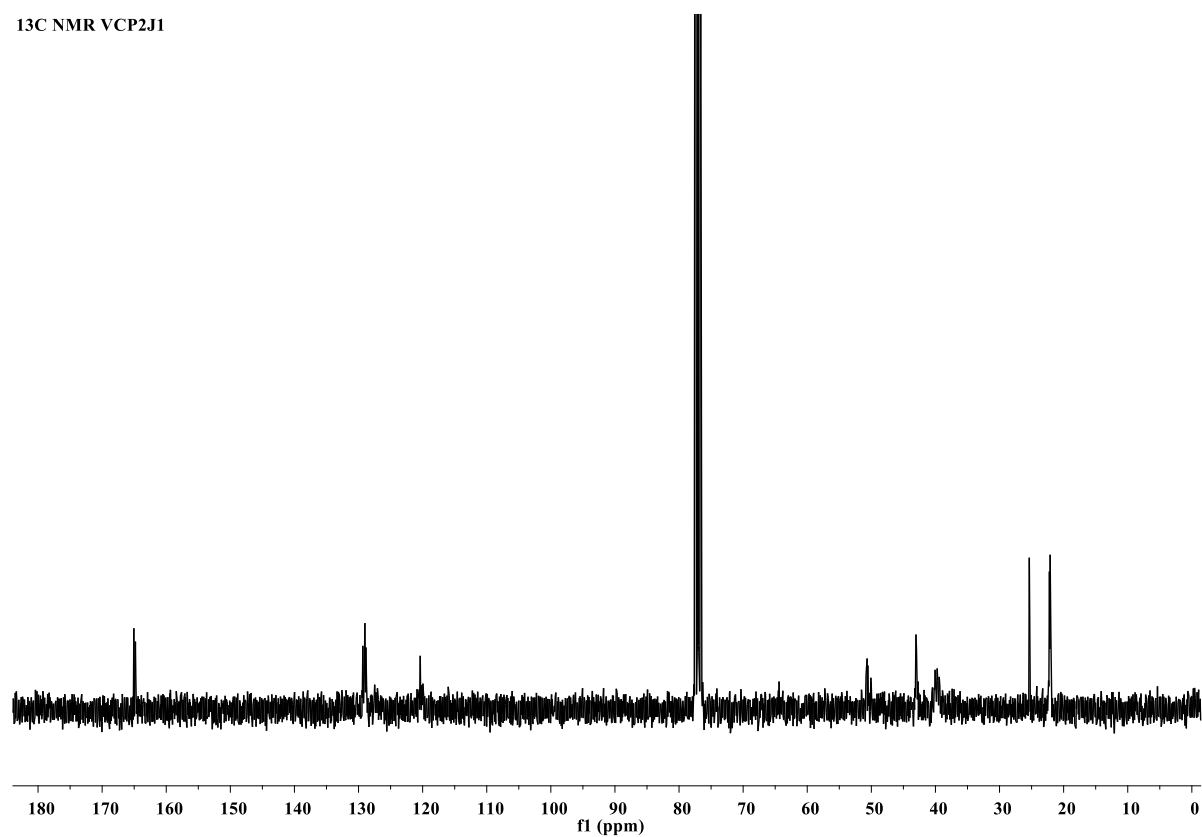

## Poly(N-Cyclopropyl-2-cyano-hex-4-enamide) VCP2J2

<sup>1</sup>H NMR VCP2J2

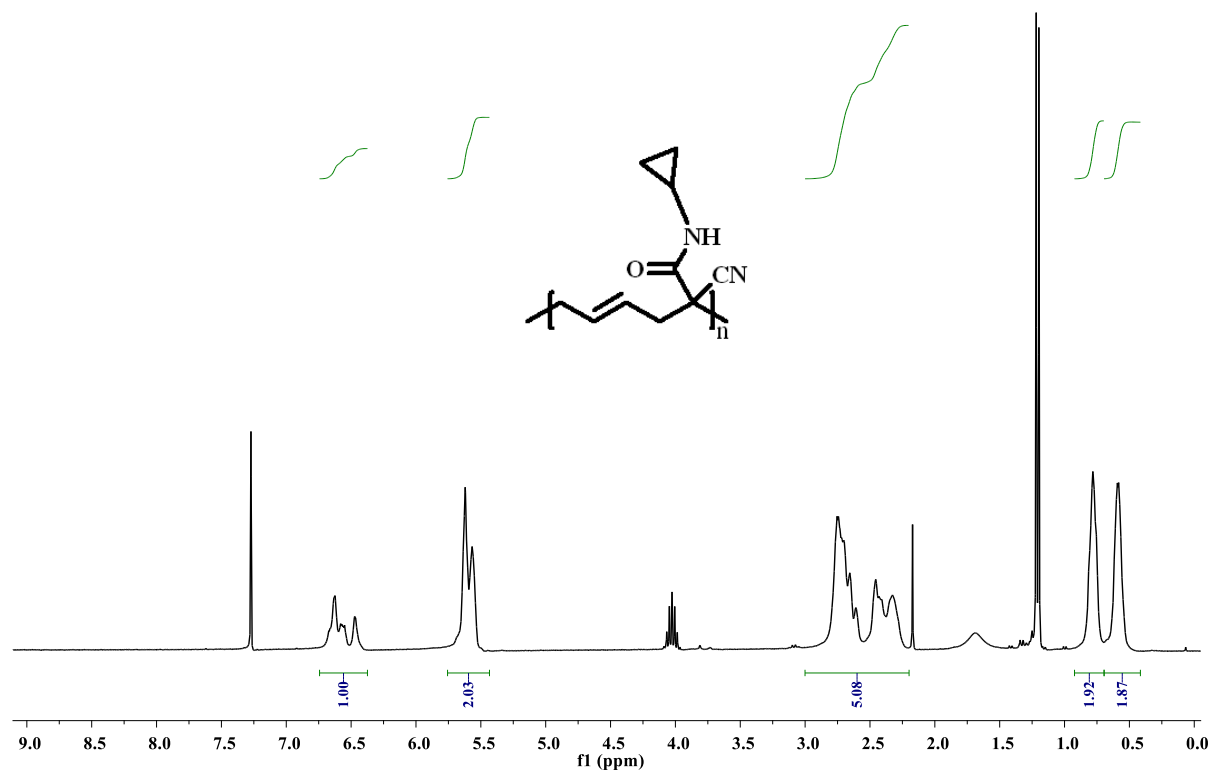

<sup>13</sup>C NMR VCP2J2

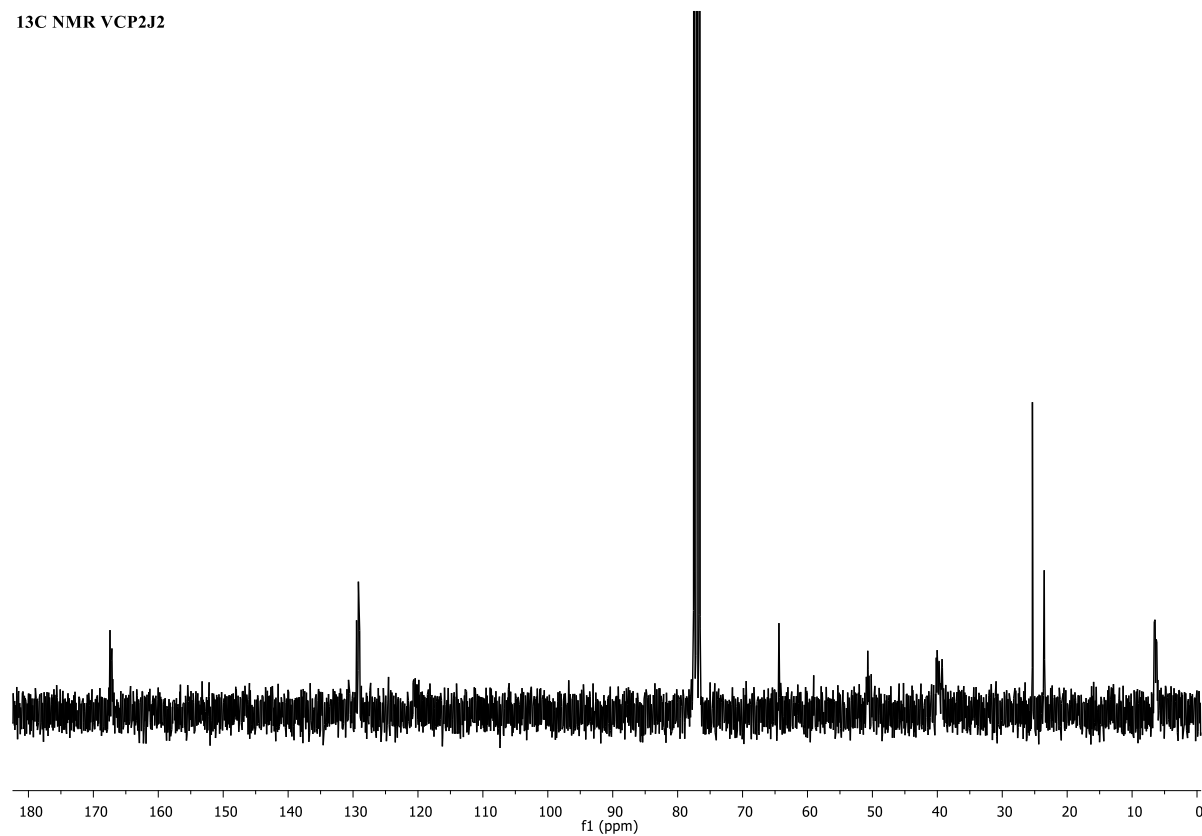

## Poly(N-Butyl-2-cyano-4-enamide) VCP2J3

<sup>1</sup>H NMR VCP2J3

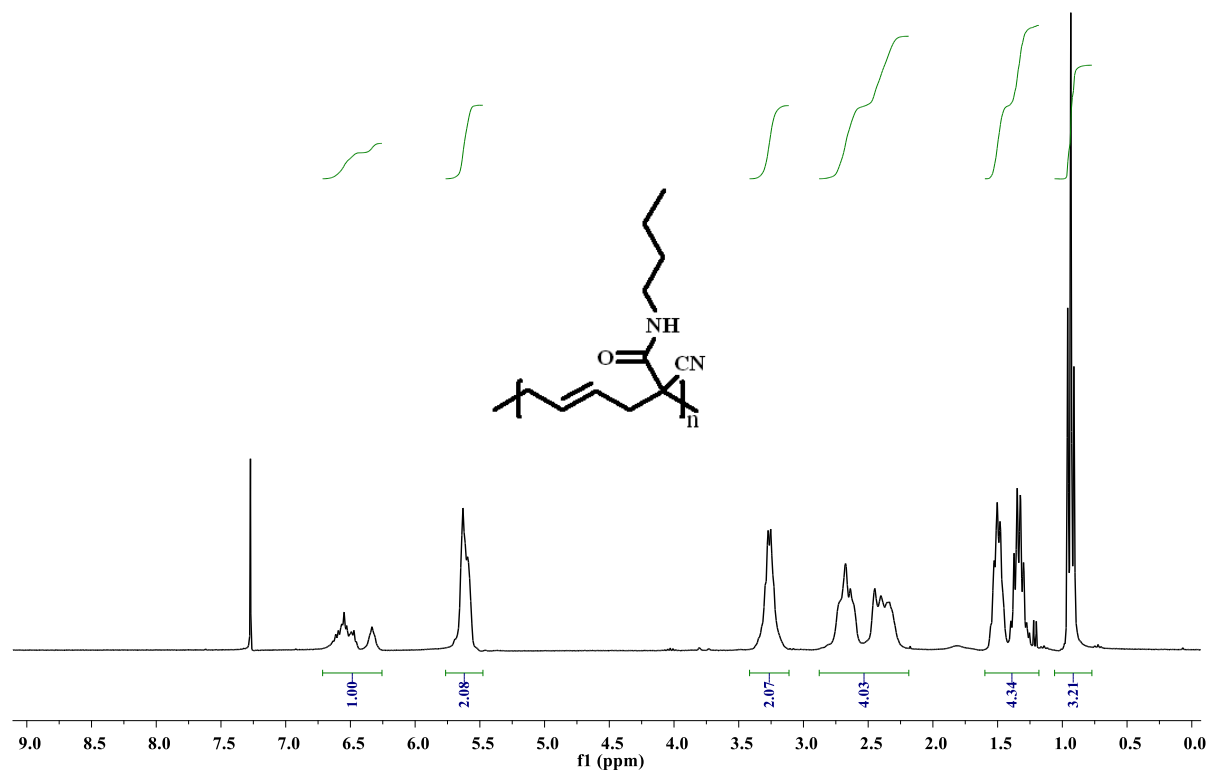

<sup>13</sup>C NMR VCP2J3

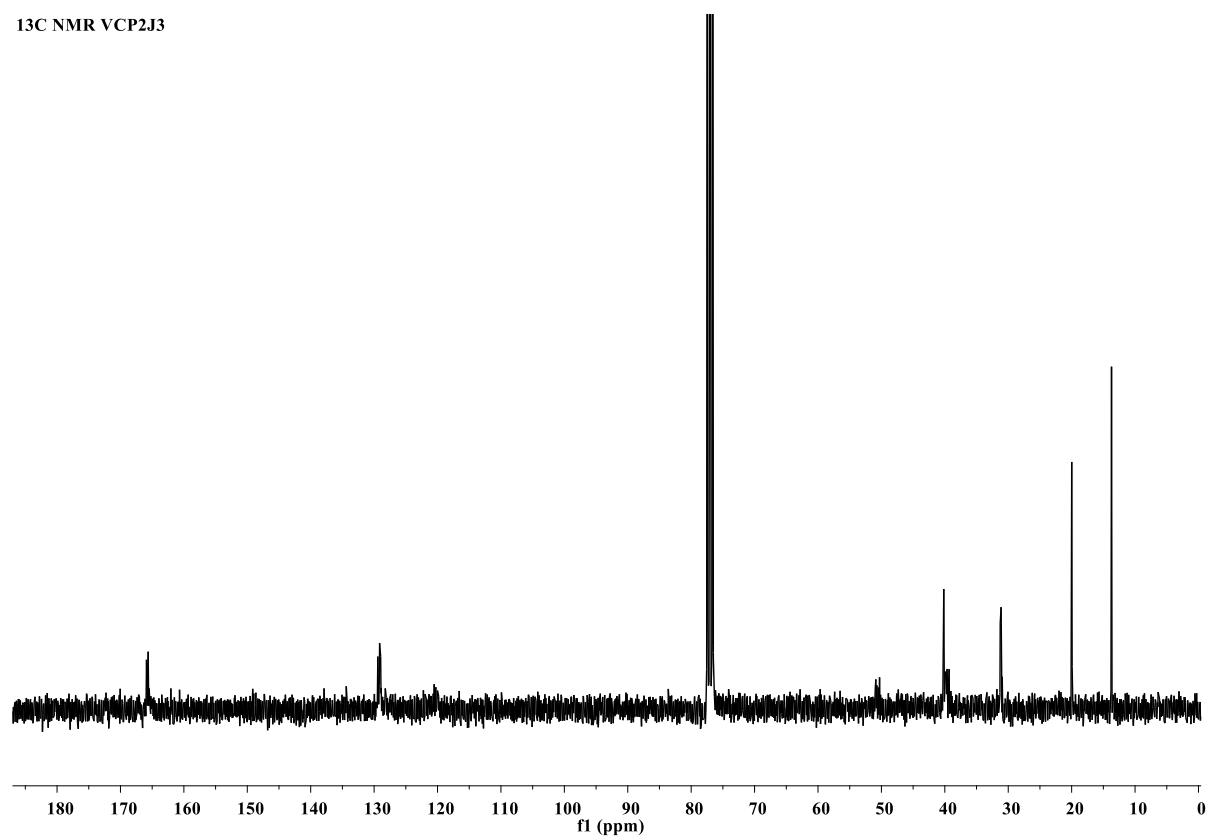

## Poly(N-Hexyl-2-cyanohex-4-enamide) VCP2J4

<sup>1</sup>H NMR VCP2J4

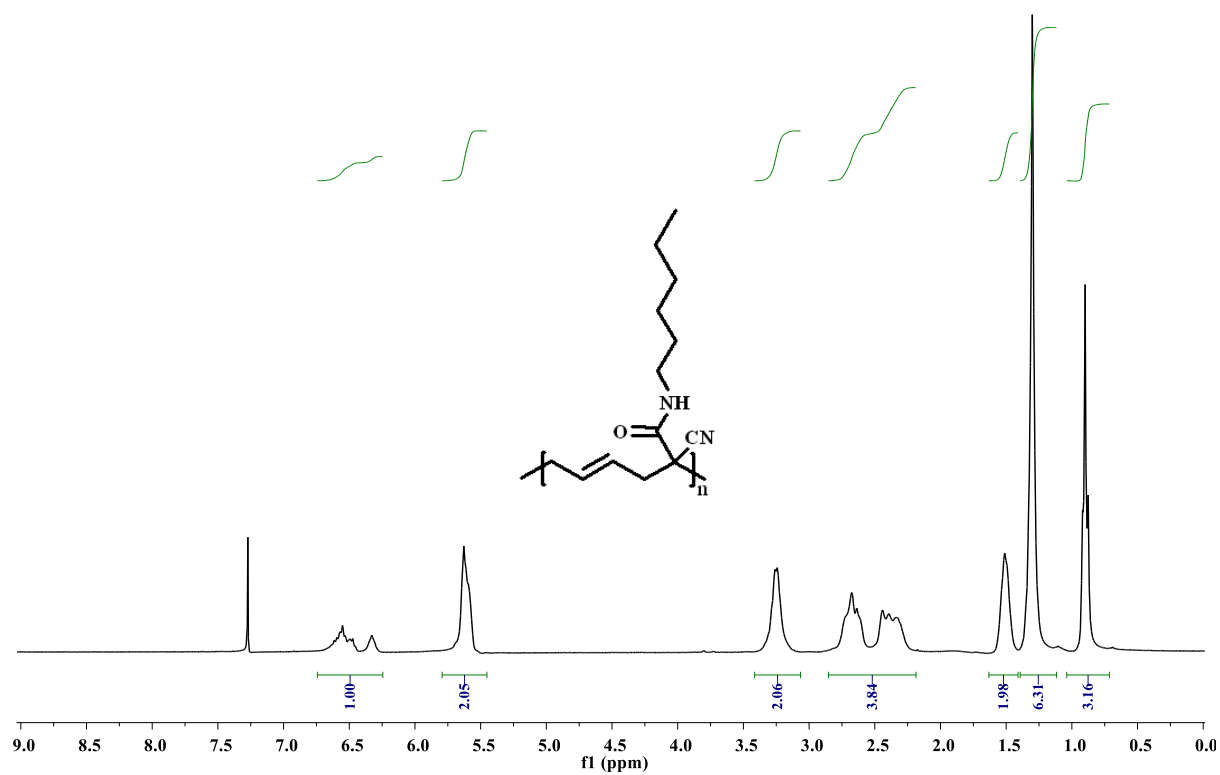

<sup>13</sup>C NMR VCP2J4

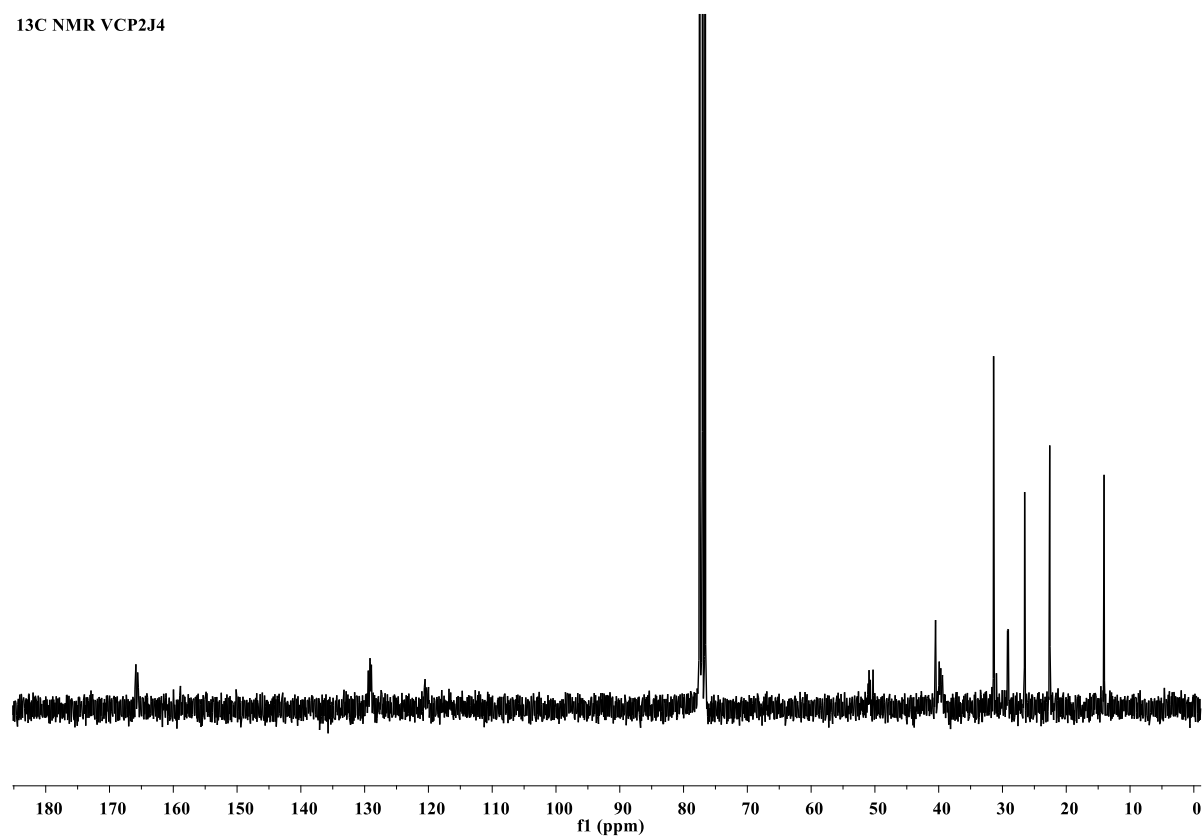

## Poly(N-(2-ethyl)Hexyl-2-cyano-hex-4-enamide) VCP2J5

<sup>1</sup>H NMR VCP2J5

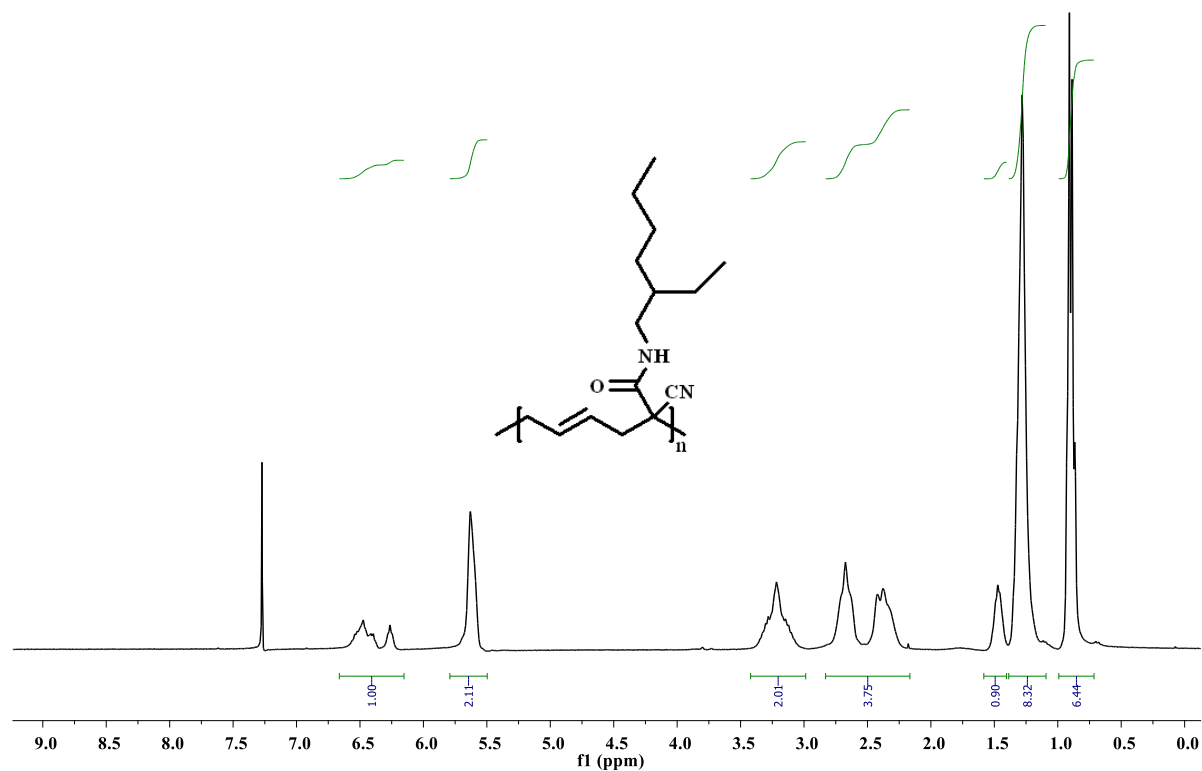

<sup>13</sup>C NMR VCP2J5

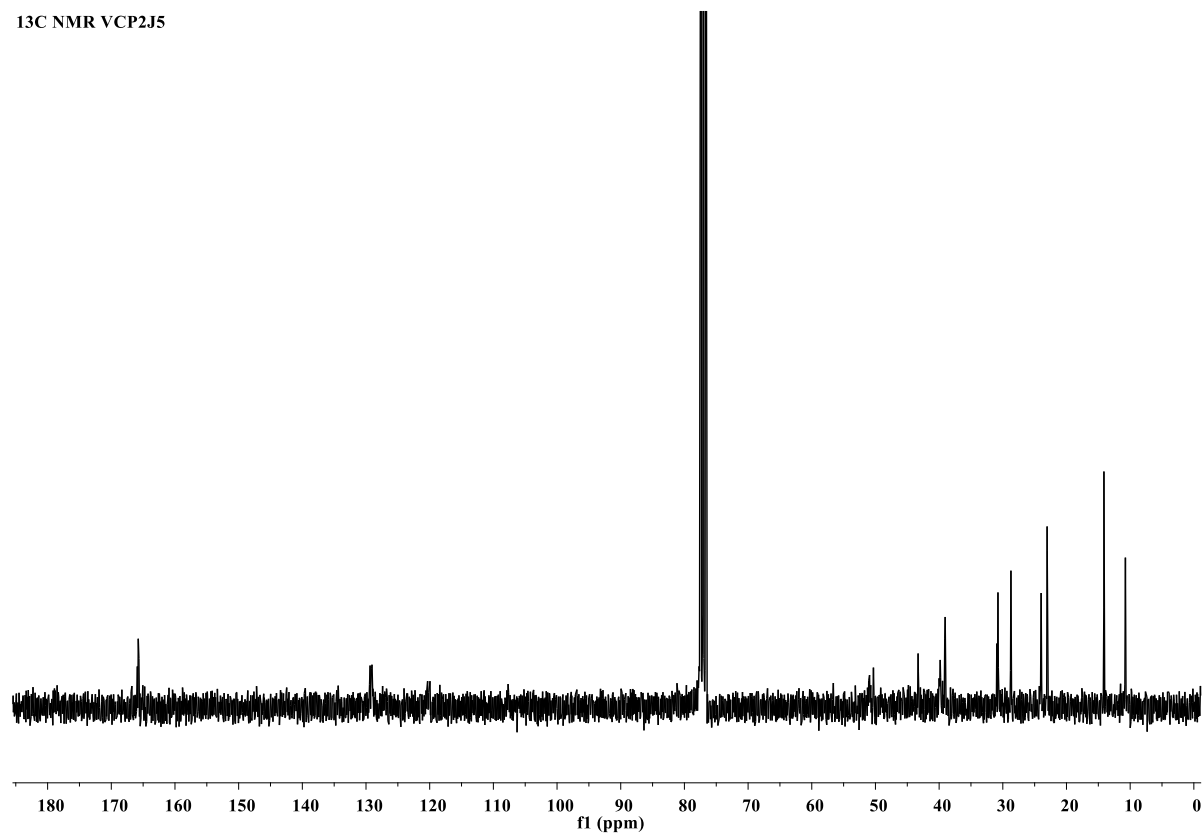

## Cloud point measurements

### 1) Cloud point of Poly(N-Cyclopropyl-2-cyano-hex-4-enamide) VCP2J2 in methanol and methanol-water mixture.

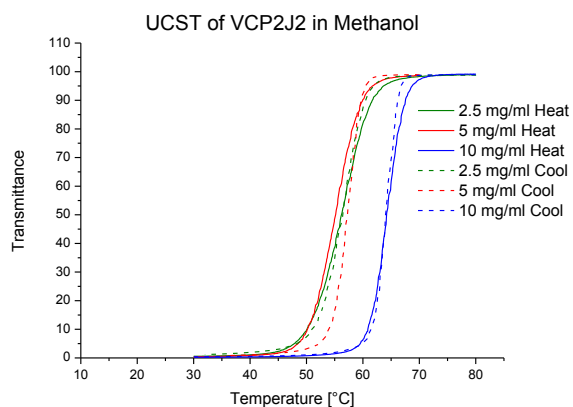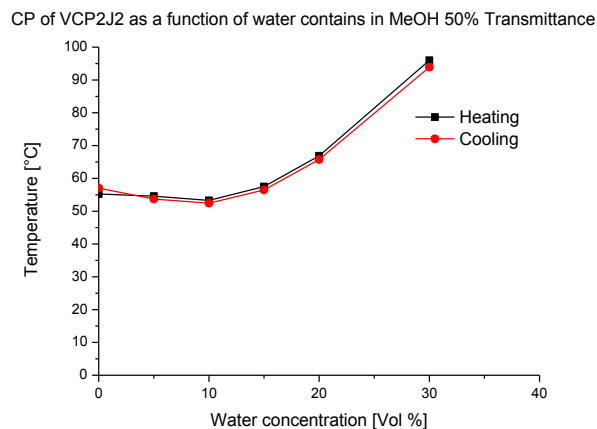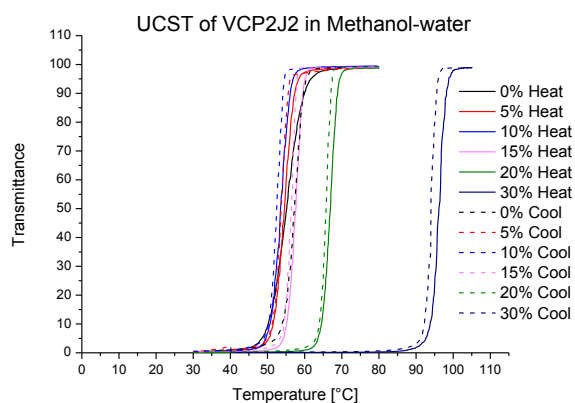

### 2) Cloud point in ethanol as a function of amide moiety.

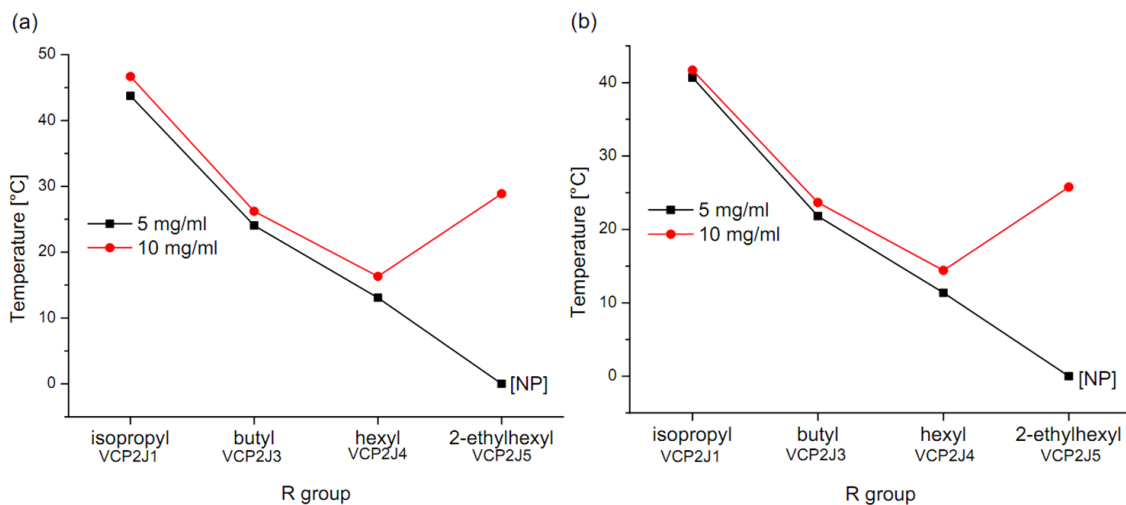

Cloud point (CP) in ethanol as a function amide moiety at 50% transmittance. (a) Cloud point upon heating and (b) Cloud point upon cooling. NP (No precipitation)

## Gel permeation Chromatography

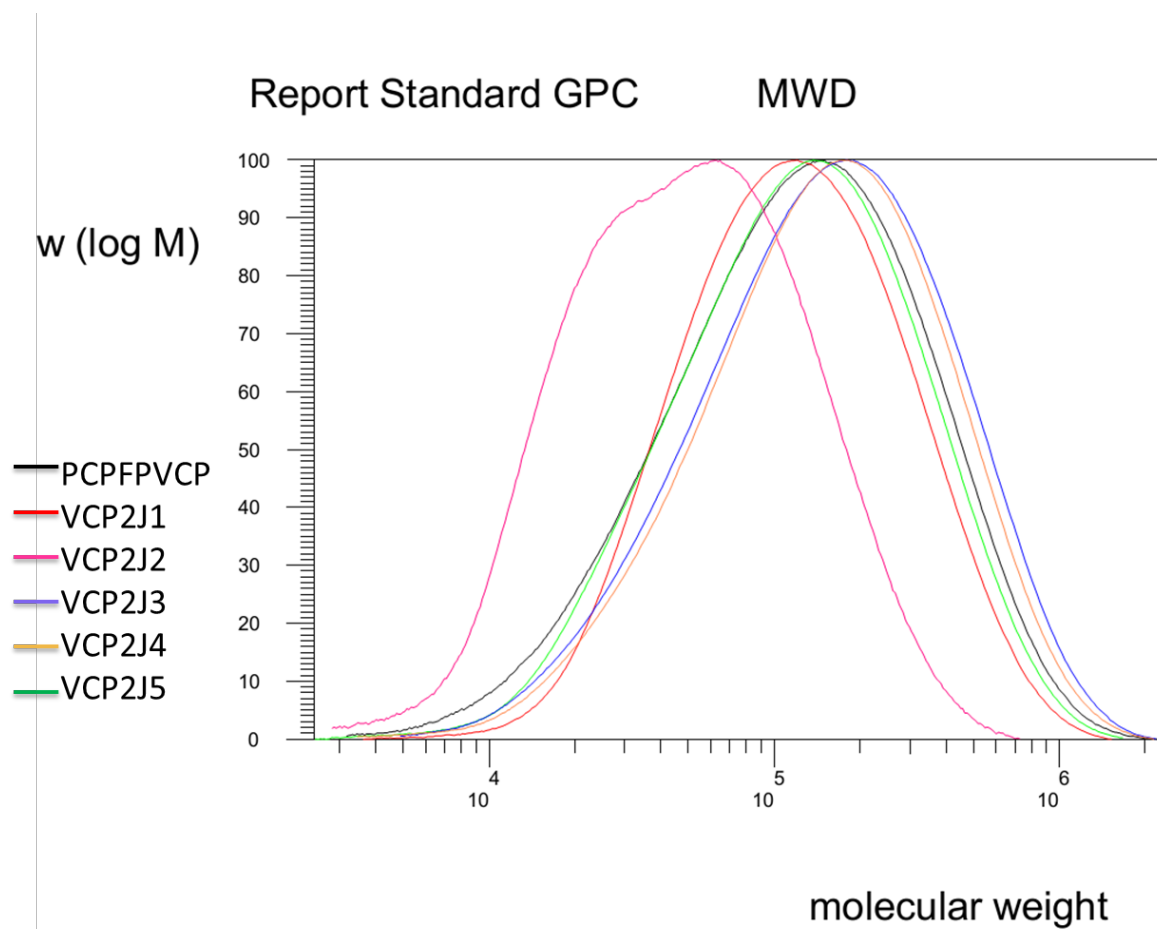

Supplement: c3py00109a.pdf [file c3py00109a.pdf]
